# Supplementary material
Source: HighWire-hosted journal article supplement (https://www.cmajopen.ca/highwire/filestream/85281/field_highwire_adjunct_files/2/2020-0201-original-submission.pdf)
Supplement: 2020-0201-original-submission.pdf [file 2020-0201-original-submission.pdf]

1  
2  
3 **Identifying maternal deaths using hospital data vs.**  
4 **death certificates: population-based study**  
5

6 Kayvan Aflaki, HBSc  
7 Institute of Medical Science  
8 University of Toronto  
9 Toronto, Canada  
10

11  
12 Alison L. Park, MSc  
13 ICES  
14 Toronto, Canada  
15

16  
17 Chantal Nelson, PhD  
18 Maternal, Child and Youth Health Division, Centre for Surveillance and Applied Research  
19 Public Health Agency of Canada  
20 Ottawa, Canada  
21

22  
23 Wei Luo, MBBS, MSc  
24 Maternal, Child and Youth Health Division, Centre for Surveillance and Applied Research  
25 Public Health Agency of Canada  
26 Ottawa, Canada  
27

28  
29 Joel G. Ray MD, MSc  
30 Departments of Medicine and Obstetrics and Gynaecology  
31 St. Michael's Hospital  
32 Toronto, Canada  
33

34 **Corresponding Author**

35 Dr. Joel G. Ray, MD MSc  
36 [Joel.Ray@unityhealth.to](mailto:Joel.Ray@unityhealth.to)  
37 (416) 864-6060 ext. 77442  
38 St. Michael's Hospital  
39 30 Bond St.  
40 Toronto, Canada  
41 M5B 18W  
42

43 **Declaration of Interest**

44 The authors confirm that there are no known conflicts of interest associated with this work.  
45

46  
47 **Funding Statement**

48 This study was funded by the Public Health Agency of Canada's Canadian Perinatal Surveillance System.  
49

50  
51 **Abstract word count:** 247 words

52 **Text word count:** 1731 words  
53  
54  
55  
56  
57  
58  
59  
60

## Abstract

**Background:** Accurate identification of maternal deaths is paramount for audit and policy purposes. Agreement between pregnancy deaths recorded in hospital vs. those on a death certificate is unknown.

**Methods:** This population-based retrospective study was completed in all of Ontario, Canada, April 1, 2002-December 31, 2014. The Canadian Institute of Health Information (CIHI) databases were used to identify deaths during inpatient, emergency department and same-day-surgery encounters. Vital Statistics deaths were captured in the Ontario Office of the Registrar General Deaths (ORGD) database. Deaths were considered  $\leq 42$  days and  $\leq 365$  days following ending of a pregnancy, including recognized pregnancies resulting in a livebirth, stillbirth, miscarriage, ectopic pregnancy, or induced abortion.

**Results:** Of the 1,679,455 livebirths/stillbirths, 398 ORGD maternal deaths were mapped to a birth in CIHI, while 77 (16.2%) were not. Among 2,039,849 recognized pregnancies, 534 ORGD pregnancy-related deaths were linked to CIHI, and 68 (11.3%) were not. Among livebirths/stillbirths, upon removing unlinked ORGD pregnancy-related deaths, concordance measures between CIHI and ORGD for maternal death  $\leq 42$  days included a Kappa of 0.87 (95% CI 0.82-0.91) and positive percent agreement (PPA) of 0.88 (95% CI 0.83-0.94). For maternal deaths arising  $\leq 42$  days of a recognized pregnancy, the corresponding measures were similar. However, when unlinked ORGD deaths were retained, agreement measures declined for deaths  $\leq 42$  days of a livebirth/ stillbirth (Kappa 0.68, 95% CI 0.62-0.74; PPA 0.57, 95% CI 0.50-0.63).

**Interpretation:** Maternal mortality cannot be ascertained solely using hospital data, including beyond 42 days after pregnancy.

## Introduction

While rare, maternal mortality is an often preventable event with devastating consequences for families and care providers. The World Health Organization (WHO) estimates that more than 300,000 women die each year from pregnancy or childbirth-related complications.<sup>1</sup> In 2010, the WHO noted a sharp increase in maternal mortality in Canada.<sup>2</sup> These findings prompted the Society of Obstetricians and Gynaecologists of Canada to work with federal and provincial partners to review maternal mortality surveillance.<sup>3</sup> The investigating committee found that national maternal health surveillance faced serious barriers relating to data access, coverage, timeliness and completeness. Moreover, their report concluded that there was little standardization across jurisdictions with respect to definitions, data collection, and maternal mortality review processes.<sup>3,4</sup> Although several provinces and territories have since established maternal death review committees, there is no national system to synthesize and report on maternal mortality, and thus, no accurate national picture of mortality prevalence and trends.<sup>3,4</sup> This is especially so for maternal deaths occurring prior to the conventional birthing period, such as an ectopic pregnancy, induced abortion or miscarriage, or for deaths occurring after the conventional postpartum period of birth up to 42 days thereafter.

Since Ontario contributes about 35% of all births in Canada,<sup>5,6</sup> there arises an opportunity to examine the systems responsible for monitoring and recording maternal mortality. Accordingly, the current study was undertaken to determine the accuracy, completeness, and level of agreement between pregnancy deaths in hospital and those recorded on a death certificate. This was done considering not only births, but also ectopic pregnancies, induced abortions, and miscarriages, as well as capturing maternal deaths up to 365 days after pregnancy.

## Methods

### *Study design*

This population-based retrospective study was completed in the entire province of Ontario, Canada, from April 1, 2002 to December 31, 2014. We used existing datasets linked using unique encoded identifiers and analyzed at ICES.

### *Data sources*

The Ontario Office of the Registrar General Deaths (ORGD) database was used to identify deaths based on a Medical Certificate of Death (“Form 16”), completed by a physician.<sup>7</sup> The ORGD shares Vital Statistics death data with Statistics Canada for national reporting. The ORGD includes date, location and International Statistical Classification of Diseases and Related Health Problems, Tenth Revision (ICD-10) codes for cause of death. Deaths occurring in a hospital setting were identified using the Canadian Institute of Health Information (CIHI) Discharge Abstract Database (DAD), the National Ambulatory Care Reporting System (NACRS) database, and the Same Day Surgery (SDS) database.<sup>8</sup> The CIHI-DAD contains administrative, clinical, and demographic information pertaining to hospital discharges (i.e., deaths, sign-outs and transfers). Diagnostic codes are based on the ICD-10 Canada (ICD-10-CA), and procedural codes are based on the Canadian Classification of Health Interventions.<sup>9</sup> The CIHI-NACRS contains hospital- and community-based emergency and ambulatory care visit information, and the CIHI-SDS contains patient-level data for day surgery institutions in Ontario.<sup>9,10</sup>

### *Participants*

Livebirths and stillbirths were identified in CIHI-DAD and NACRS. The CIHI-DAD, NACRS and SDS databases were used to capture all recognized pregnancies, namely a livebirth, a stillbirth  $\geq$  20 weeks’ gestation, a miscarriage  $<$  20 weeks’ gestation, an ectopic pregnancy, or an induced abortion. The ORGD was used to identify the death of a woman any time within 365 days after the end of a recognized pregnancy. Therein, an ICD-10 cause of death code starting with “O” was further used to identify a pregnancy-related death.

Included were Ontario resident females aged 10 to 55 years at the time of a documented encounter for a recognized pregnancy outcome in CIHI and/or a registered death in ORGD – each between April 1, 2002 and December 31, 2015. Excluded were records possessing an invalid Ontario Health Insurance Plan (OHIP) number or hospitalization number, a non-Ontario postal code, as well as those records with non-unique patient or hospital record identifiers.

### *Statistical analysis*

Agreement statistics (95% confidence intervals [CI]) were generated from 2 x 2 tables, describing the concordance between pregnancy deaths identified in CIHI and those in ORGD, first for deaths limited to women with a livebirth or stillbirth, and then among all recognized pregnancies, with consideration of deaths within 42 days and within 365 days of the pregnancy.

Agreement measures included Cohen's Kappa, sensitivity, specificity, positive predictive value, negative predictive value, overall percent agreement (OPA), positive percent agreement (PPA) and negative percent agreement (NPA). OPA, PPA and NPA, whose calculations are shown in Table S1, are generally used in the absence of a perfect reference standard, as might be the case with using ORGD, if a pregnancy is unrealized or the maternal death was beyond 42 days after birth.

### *Ethics approval*

The use of data in this project was authorized under section 45 of Ontario's Personal Health Information Protection Act, which does not require review by a research ethics board.

## **Results**

### *Number of maternal deaths*

We identified 1,679,455 livebirth or stillbirth deliveries in CIHI-DAD or CIHI-NACRS (Figure 1, green). We matched these records to an identified maternal death in ORGD (Figure 1, blue). There were 398 ORGD birth-related deaths that could be mapped to a birth within the preceding 365 days in the CIHI-DAD or NACRS, while 77 pregnancy-related deaths (16.2%) in ORGD had no birth record in CIHI (Figure 1, red). Cause of death within 42 days of birth, classified by the 3-digit ICD-10 code, is shown in Table S2, and that for deaths between 43 and 365 after birth is shown in Table S3.

There were 2,039,849 recognized pregnancies in CIHI-DAD, NACRS or SDS (Figure 2, purple). 534 ORGD pregnancy-related deaths could be linked to these CIHI databases, while 68 (11.3%) could not (Figure 2, red).

### *Measures of concordance*

Among livebirths and stillbirths, and upon removing unlinked ORGD pregnancy-related deaths, concordance measures for maternal deaths  $\leq 42$  days were high (Table 1a). For example, Cohen's Kappa was 0.87 (95% CI 0.82 to 0.91), PPA 0.88 (95% CI 0.83 to 0.94) and NPA 1.00 (95% CI 1.00 to 1.00). For maternal deaths arising  $\leq 42$  days of the ending of a recognized pregnancy, the corresponding measures were 0.82 (95% CI 0.78 to 0.87), 0.84 (95% CI 0.78 to 0.90) and 1.00 (95% CI 1.00 to 1.00) (Table 1b).

When unlinked ORGD were retained, however, agreement measures declined for maternal death  $\leq 42$  days of a livebirth or stillbirth, with Cohen's Kappa of 0.68 (95% CI 0.62 to 0.74) and PPA of 0.57 (95% CI 0.50 to 0.63) (Table 2a). The same pattern was seen for maternal deaths  $\leq 42$  days of a recognized pregnancy (Table 2b).

For maternal deaths  $\leq 365$  days of a livebirth or stillbirth (Table 3a), or  $\leq 365$  days after a recognized pregnancy (Table 3b), the concordance statistics were, again, generally favourable if unlinked ORGD pregnancy-related deaths were removed, but substantially declined when they were retained (Tables 4a and 4b).

### **Discussion**

In this population-based study, about 16% of maternal deaths following a livebirth or stillbirth, and 11% of deaths after a recognized pregnancy (i.e., livebirth, stillbirth, ectopic pregnancy, miscarriage or induced abortion) were not captured during a CIHI hospital encounter when they were documented in the ORGD death record. When linkage between the CIHI and ORGD was possible, there was a high concordance for maternal deaths, which declined when non-linked cases were also considered.

### *Clinical and policy relevance*

While Canada's maternal mortality rate is among the lowest in the world, a complete picture (the "universe") of maternal deaths is lacking.<sup>11</sup> Nearly 60% of all deaths in Ontario between 2001 and 2015 occurred in a hospital setting.<sup>12</sup> The current study further suggests that maternal mortality cannot be ascertained solely using hospital data, and highlights the need for

1  
2  
3 improved methodology to effectively capture maternal mortality beyond 42 days after  
4 pregnancy.  
5

6  
7 It has been challenging to develop a national maternal mortality enquiry system, given  
8 Canada's province-based approach to health care administration. Nevertheless, Canadian  
9 provinces and territories can, and do, collaborate in the design, development, and collection of  
10 national disease surveillance. Replication of the current study methods in other provinces and  
11 territories is one step in achieving a better perspective about how maternal deaths can be  
12 accurately and efficiently captured, including input from the chief coroner of each province.  
13  
14  
15  
16  
17

18 To ascertain more accurate and complete information on maternal mortality, and to enable  
19 deterministic linkage between hospital and Vital Statistics data sources, we recommend  
20 amending provincial and territorial death certificates to include a fillable field for an individual's  
21 provincial health insurance plan number, such as the OHIP number in Ontario. We also  
22 recommend that all pregnancies be captured – regardless of how the pregnancy ends – with  
23 the inclusion of women who die while still pregnant.  
24  
25  
26  
27  
28  
29

### 30 *Limitations*

31  
32 Our study has several limitations. First, not all miscarriages or induced abortions are captured  
33 by the study datasets.<sup>13,14</sup> In order to parallel those datasets currently available to the Canadian  
34 Perinatal Surveillance System, we opted to use only the CIHI and Vital Statistics files. A broader  
35 dataset might also include provincial billing information, for example, which might enhance  
36 capture of induced abortion codes.<sup>13,14</sup> Second, there were inherent problems in creating the  
37 current data linkages. In Ontario, a Medical Certificate of Death (Form 16) does not include a  
38 fillable field for an OHIP number, which serves as a unique identifier for all residents of Ontario.  
39 Matching maternal deaths from the Vital Statistics registry to hospitalization information  
40 depended on a probabilistic linkage method, which uses non-unique linkage keys, such as first  
41 and last name combinations and date of birth. Such an approach is prone to false-positive and  
42 false-negative linkages.<sup>15</sup> For example, if a hospitalization record could not be linked to an  
43 existing Vital Statistics record with certainty, then that record was deemed a non-match. Lastly,  
44 deaths within CIHI are not linkable for individuals without a registered provincial health  
45  
46  
47  
48  
49  
50  
51  
52  
53  
54  
55  
56  
57  
58  
59  
60

1  
2  
3 insurance plan number, which might miss maternal deaths among temporary visa holders,  
4 recent refugees and undocumented residents – the majority who reside in larger urban centres,  
5 including Toronto.<sup>16,17</sup> Hence, the true scope of maternal mortality in Ontario may be higher  
6  
7 than was reflected in the current study.  
8  
9

### 10 11 12 *Conclusion*

13  
14 Vital Statistics death records likely capture the scope of maternal deaths in Ontario, more  
15 accurately and completely than using CIHI hospital records alone. To improve the quality of  
16 data linkage, we propose amending provincial and territorial medical death certificates to  
17 include fields for health insurance numbers, and the capture of all deaths in, or after,  
18 pregnancy.  
19  
20  
21  
22

23  
24  
25 **Contributors:** Chantal Nelson, Alison Park and Joel Ray conceived of the study. Chantal Nelson,  
26 Wei Luo, Alison Park, and Joel Ray contributed to the study design and data interpretation.  
27 Alison Park analyzed the data. Kayvan Aflaki and Joel Ray drafted the manuscript. All the  
28 authors revised the manuscript critically for important intellectual content, approved the final  
29 version to be published and agreed to be account-able for all aspects of the work.  
30  
31  
32  
33

34  
35  
36 **Funding:** This study was funded by the Public Health Agency of Canada, and supported by ICES,  
37 which is funded by an annual grant from the Ontario Ministry of Health and Long-Term Care  
38 (MOHLTC).  
39  
40  
41  
42

43  
44 **Data sharing:** The data set from this study is held securely in coded form at ICES. Although  
45 data-sharing agreements prohibit ICES from making the data set publicly available, access may  
46 be granted to those who meet prespecified criteria for confidential access, available at  
47 [www.ices.on.ca/DAS](http://www.ices.on.ca/DAS). The full data set creation plan and underlying analytic code are available  
48 from the authors on request, with the understanding that the computer programs may rely on  
49 coding templates or macros that are unique to ICES and are therefore inaccessible or may  
50 require modification.  
51  
52  
53  
54  
55  
56  
57  
58  
59  
60



1  
2  
3 **Disclaimer:** Parts of this material are based on data and information compiled and provided by  
4 MOHLTC and CIHI. The analyses, conclusions, opinions, and statement expressed herein are  
5 solely those of the authors and do not reflect those of the funding or data sources; no  
6 endorsement is intended or should be inferred. Parts of this report are based on Ontario  
7 Registrar General information on deaths, the original source of which is ServiceOntario. The  
8 views expressed therein are those of the author and do not necessarily reflect those of ORG or  
9 Ministry of Government Services.  
10  
11  
12  
13  
14  
15  
16  
17  
18  
19  
20  
21  
22  
23  
24  
25  
26  
27  
28  
29  
30  
31  
32  
33  
34  
35  
36  
37  
38  
39  
40  
41  
42  
43  
44  
45  
46  
47  
48  
49  
50  
51  
52  
53  
54  
55  
56  
57  
58  
59  
60

Confidential

## References

1. Alkema L, Chou D, Hogan D, Zhang S, Moller A-B, Gemmill A, et al. Global, regional, and national levels and trends in maternal mortality between 1990 and 2015, with scenario-based projections to 2030: a systematic analysis by the UN Maternal Mortality Estimation Inter-Agency Group. *Lancet*. 2016;387(10017):462-74.
2. The World Health Organization, United Nations Children’s Fund, United Nations Population Fund, and The World Bank. Trends in maternal mortality: 1990 to 2010: estimates by the WHO, UNICEF, UNFPA, and The World Bank. [https://apps.who.int/iris/bitstream/handle/10665/44874/9789241503631\\_eng.pdf;jsessionid=63F82B9506FD887EE5064810723604C5?sequence=1](https://apps.who.int/iris/bitstream/handle/10665/44874/9789241503631_eng.pdf;jsessionid=63F82B9506FD887EE5064810723604C5?sequence=1). Published May 2012. Accessed July 2020.
3. Cook JL and Sprague AE. Measuring Maternal Mortality in Canada: An Update on the Establishment of a Confidential Enquiry System for Preventing Maternal Deaths #savingmoms #savingbabies. *J Obstet Gynaec Can*. 2019;41(12):1768-1771.
4. Allen VM, Campbell M, Carson G, Fraser W, Liston RM, Walker M, et al. Maternal mortality and severe maternal morbidity surveillance in Canada. *J Obstet Gynaec Can*. 2010;32(12):1140-1146.
5. Estimates of the Comparisons of Economic Growth, Annual. Statistics Canada. <https://www150.statcan.gc.ca/t1/tbl1/en/tv.action?pid=1710000801>. Revised February 2020. Accessed July 2020.
6. Office of Economic Policy. *Ontario Population Projections, 2018–2046*. Toronto, ON: Ontario Ministry of Finance; 2019:111.
7. Vital Statistics Mortality Data. Association of Public Health Epidemiologists in Ontario. <https://www.apheo.ca/data-vital-stats-mortality>. Revised October 2019. Accessed July 2020.
8. Hospital Standardized Mortality Ratio (HSMR). Canadian Institute for Health Information. <https://www.cihi.ca/en/hospital-standardized-mortality-ratio-hsmr>. Revised July 2020. Accessed July 2020.

- 1  
2  
3 9. Discharge Abstract Database metadata (DAD). Canadian Institute for Health  
4 Information. <https://www.cihi.ca/en/discharge-abstract-database-metadata-dad>.  
5  
6 Revised July 2020. Accessed July 2020.  
7
- 8  
9 10. National Ambulatory Care Reporting System metadata (NACRS). Canadian Institute for  
10 Health Information. [https://www.cihi.ca/en/national-ambulatory-care-reporting-](https://www.cihi.ca/en/national-ambulatory-care-reporting-system-metadata-nacrs)  
11 [system-metadata-nacrs](https://www.cihi.ca/en/national-ambulatory-care-reporting-system-metadata-nacrs). Revised July 2020. Accessed July 2020.  
12  
13
- 14 11. World Health Organization, United Nations Children's Fund, United Nations Population  
15 Fund, The World Bank, United Nations Population Division. Trends in maternal  
16 mortality: 2000 to 2017: estimates by WHO, UNICEF, UNFPA, World Bank Group and the  
17 United Nations Population Division. [https://www.unfpa.org/sites/default/files/resource-](https://www.unfpa.org/sites/default/files/resource-pdf/Maternal_mortality_exec_summary.pdf)  
18 [pdf/Maternal\\_mortality\\_exec\\_summary.pdf](https://www.unfpa.org/sites/default/files/resource-pdf/Maternal_mortality_exec_summary.pdf). Published September 2019. Accessed  
19 February 2020.  
20  
21  
22
- 23 12. Deaths, by place of death (hospital or non-hospital). Statistics Canada.  
24  
25 <https://www150.statcan.gc.ca/t1/tbl1/en/tv.action?pid=1310071501>. Accessed July  
26 2020.  
27  
28
- 29 13. Liu N, Farrugia MM, Vigod SN, Urguia ML, Ray JG. Intergenerational abortion tendency  
30 between mothers and teenage daughters: a population-based cohort study. *Can Med*  
31 *Assoc J*. 2018;190(4):95-102.  
32  
33
- 34 14. Liu N, Vigod SN, Farrugia MM, Urquia ML, Ray JG. Physician procedure volume and  
35 related adverse events after surgically induced abortion: a population-based cohort  
36 study. *Can Med Assoc J*. 2019;191(19):519-28.  
37  
38
- 39 15. Moore CL, Gidding HF, Law MG, Amin J. Poor record linkage sensitivity biased outcomes  
40 in a linked cohort analysis. *J Clin Epidemiol*. 2016;75(1):70-77.  
41  
42
- 43 16. Magalhaes L, Carrasco C, Gastaldo D. Undocumented migrants in Canada: A scope  
44 literature review on health, access to services, and working conditions. *J Immigr Minor*  
45 *Health*. 2010;12(1):132-51.  
46  
47
- 48 17. Bernhard JK, Goldring L, Young J, Berinstein C, Wilson B. Living with Precarious Legal  
49 Status in Canada: Implications for the Well-Being of Children and Families. *Refuge: Can J*  
50 *Ref*. 2007;24(2):101-14.  
51  
52  
53  
54  
55  
56  
57  
58  
59  
60

1  
2  
3  
4  
5  
6  
7  
8  
9  
10  
11  
12  
13  
14  
15  
16  
17  
18  
19  
20  
21  
22  
23  
24  
25  
26  
27  
28  
29  
30  
31  
32  
33  
34  
35  
36  
37  
38  
39  
40  
41  
42  
43  
44  
45  
46  
47  
48  
49  
50  
51  
52  
53  
54  
55  
56  
57  
58  
59  
60

18. Campbell R, Klei AG, Hodges BD, Fisman D, Kitto S. A comparison of health access between permanent residents, undocumented immigrants and refugee claimants in Toronto, Canada. *J Immigr Minor Health*. 2014;16(1):165-76.

Confidential

**Table 1. a.** Maternal deaths  $\leq$  42 days of a livebirth or stillbirth, comparing CIHI-DAD or CIHI-NACRS, vs. ORGD. Results exclude unlinked ORGD pregnancy-related deaths (Figure 1, **red**) in the numerator and denominator during percent agreement calculations. **b.** Maternal deaths  $\leq$  42 days of the ending of a recognized pregnancy, comparing a recognized pregnancy in CIHI-DAD, CIHI-NACRS or CIHI-SDS, vs. ORGD. Results exclude unlinked ORGD pregnancy-related deaths (Figure 2, **red**) in the numerator and denominator during percent agreement calculations.

a.

| CIHI death                 | ORGD death            |           | Total     |
|----------------------------|-----------------------|-----------|-----------|
|                            | Yes                   | No        |           |
| Yes                        | 122                   | 22        | 144       |
| No                         | 16                    | 1,679,295 | 1,679,311 |
| <b>Agreement indicator</b> | <b>Value (95% CI)</b> |           |           |
| Total                      | 138                   | 1,679,317 | 1,679,455 |

|                                   |                     |
|-----------------------------------|---------------------|
| <b>Cohen's Kappa</b>              | 0.87 (0.82 to 0.91) |
| <b>Sensitivity</b>                | 0.88 (0.83 to 0.94) |
| <b>Specificity</b>                | 1.00 (1.00 to 1.00) |
| <b>Positive Predictive Value</b>  | 0.85 (0.79 to 0.91) |
| <b>Negative Predictive Value</b>  | 1.00 (1.00 to 1.00) |
| <b>Overall Percent Agreement</b>  | 1.00 (1.00 to 1.00) |
| <b>Positive Percent Agreement</b> | 0.88 (0.83 to 0.94) |
| <b>Negative Percent Agreement</b> | 1.00 (1.00 to 1.00) |

b.

| CIHI death                 | ORGD death            |           | Total     |
|----------------------------|-----------------------|-----------|-----------|
|                            | Yes                   | No        |           |
| Yes                        | 137                   | 34        | 171       |
| No                         | 26                    | 2,039,641 | 2,039,667 |
| <b>Agreement indicator</b> | <b>Value (95% CI)</b> |           |           |
| Total                      | 163                   | 2,039,675 | 2,039,838 |

|                                   |                     |
|-----------------------------------|---------------------|
| <b>Cohen's Kappa</b>              | 0.82 (0.78 to 0.87) |
| <b>Sensitivity</b>                | 0.84 (0.78 to 0.90) |
| <b>Specificity</b>                | 1.00 (1.00 to 1.00) |
| <b>Positive Predictive Value</b>  | 0.80 (0.74 to 0.86) |
| <b>Negative Predictive Value</b>  | 1.00 (1.00 to 1.00) |
| <b>Overall Percent Agreement</b>  | 1.00 (1.00 to 1.00) |
| <b>Positive Percent Agreement</b> | 0.84 (0.78 to 0.90) |
| <b>Negative Percent Agreement</b> | 1.00 (1.00 to 1.00) |

1  
2  
3  
4  
5  
6  
7  
8  
9  
10  
11  
12  
13  
14  
15  
16  
17  
18  
19  
20  
21  
22  
23  
24  
25  
26  
27  
28  
29  
30  
31  
32  
33  
34  
35  
36  
37  
38  
39  
40  
41  
42  
43  
44  
45  
46  
47

**Table 2. a.** Maternal deaths ≤ 42 days of a livebirth or stillbirth, comparing CIHI-DAD or CIHI-NACRS, vs. ORGD. Results include unlinked ORGD pregnancy-related deaths (Figure 1, **red**) in the numerator and denominator during percent agreement calculations. **b.** Maternal deaths ≤ 42 days of the ending of a recognized pregnancy, comparing a recognized pregnancy in CIHI-DAD, CIHI-NACRS or CIHI-SDS, vs. ORGD. Results include unlinked ORGD pregnancy-related deaths (Figure 2, **red**) in the numerator and denominator during percent agreement calculations.

a.

| CIHI death | ORGD death |           | Total     |
|------------|------------|-----------|-----------|
|            | Yes        | No        |           |
| Yes        | 122        | 22        | 144       |
| No         | 93         | 1,679,295 | 1,679,388 |
| Total      | 215        | 1,679,317 | 1,679,532 |

b.

| CIHI death | ORGD death |           | Total     |
|------------|------------|-----------|-----------|
|            | Yes        | No        |           |
| Yes, n     | 137        | 34        | 171       |
| No, n      | 94         | 2,039,652 | 2,039,746 |
| Total      | 231        | 2,039,686 | 2,039,917 |

| Agreement indicator        | Value (95% CI)      |
|----------------------------|---------------------|
| Cohen's Kappa              | 0.68 (0.62 to 0.74) |
| Sensitivity                | 0.57 (0.50 to 0.63) |
| Specificity                | 1.00 (1.00 to 1.00) |
| Positive Predictive Value  | 0.85 (0.79 to 0.91) |
| Negative Predictive Value  | 1.00 (1.00 to 1.00) |
| Overall Percent Agreement  | 1.00 (1.00 to 1.00) |
| Positive Percent Agreement | 0.57 (0.50 to 0.63) |
| Negative Percent Agreement | 1.00 (1.00 to 1.00) |

| Agreement indicator        | Value (95% CI)      |
|----------------------------|---------------------|
| Cohen's Kappa              | 0.68 (0.63 to 0.73) |
| Sensitivity                | 0.59 (0.53 to 0.66) |
| Specificity                | 1.00 (1.00 to 1.00) |
| Positive Predictive Value  | 0.80 (0.74 to 0.86) |
| Negative Predictive Value  | 1.00 (1.00 to 1.00) |
| Overall Percent Agreement  | 1.00 (1.00 to 1.00) |
| Positive Percent Agreement | 0.59 (0.53 to 0.66) |
| Negative Percent Agreement | 1.00 (1.00 to 1.00) |

**Table 3. a.** Maternal deaths  $\leq$  365 days of a livebirth or stillbirth, comparing CIHI-DAD or CIHI-NACRS, vs. ORGD. Results exclude unlinked ORGD pregnancy-related deaths (Figure 1, **red**) in the numerator and denominator during percent agreement calculations. **b.** Maternal deaths  $\leq$  365 days of the ending of a recognized pregnancy, comparing a recognized pregnancy in CIHI-DAD, CIHI-NACRS or CIHI-SDS, vs. ORGD. Results exclude unlinked ORGD pregnancy-related deaths (Figure 2, **red**) in the numerator and denominator during percent agreement calculations.

a.

| CIHI death                 | ORGD death            |           | Total     |
|----------------------------|-----------------------|-----------|-----------|
|                            | Yes                   | No        |           |
| Yes                        | 278                   | 34        | 312       |
| No                         | 120                   | 1,679,023 | 1,679,143 |
| <b>Agreement indicator</b> | <b>Value (95% CI)</b> |           |           |
| Total                      | 398                   | 1,679,057 | 1,679,455 |

|                                   |                     |
|-----------------------------------|---------------------|
| <b>Cohen's Kappa</b>              | 0.78 (0.75 to 0.82) |
| <b>Sensitivity</b>                | 0.70 (0.65 to 0.74) |
| <b>Specificity</b>                | 1.00 (1.00 to 1.00) |
| <b>Positive Predictive Value</b>  | 0.89 (0.86 to 0.93) |
| <b>Negative Predictive Value</b>  | 1.00 (1.00 to 1.00) |
| <b>Overall Percent Agreement</b>  | 1.00 (1.00 to 1.00) |
| <b>Positive Percent Agreement</b> | 0.70 (0.65 to 0.74) |
| <b>Negative Percent Agreement</b> | 1.00 (1.00 to 1.00) |

b.

| CIHI death                 | ORGD death            |           | Total     |
|----------------------------|-----------------------|-----------|-----------|
|                            | Yes                   | No        |           |
| Yes                        | 346                   | 34        | 171       |
| No                         | 188                   | 2,039,652 | 2,039,746 |
| <b>Agreement indicator</b> | <b>Value (95% CI)</b> |           |           |
| Total                      | 534                   | 2,039,686 | 2,039,917 |

|                                   |                     |
|-----------------------------------|---------------------|
| <b>Cohen's Kappa</b>              | 0.75 (0.72 to 0.78) |
| <b>Sensitivity</b>                | 0.65 (0.61 to 0.69) |
| <b>Specificity</b>                | 1.00 (1.00 to 1.00) |
| <b>Positive Predictive Value</b>  | 0.88 (0.85 to 0.91) |
| <b>Negative Predictive Value</b>  | 1.00 (1.00 to 1.00) |
| <b>Overall Percent Agreement</b>  | 1.00 (1.00 to 1.00) |
| <b>Positive Percent Agreement</b> | 0.65 (0.61 to 0.69) |
| <b>Negative Percent Agreement</b> | 1.00 (1.00 to 1.00) |

1  
2  
3  
4  
5  
6  
7  
8  
9  
10  
11  
12  
13  
14  
15  
16  
17  
18  
19  
20  
21  
22  
23  
24  
25  
26  
27  
28  
29  
30  
31  
32  
33  
34  
35  
36  
37  
38  
39  
40  
41  
42  
43  
44  
45  
46  
47

**Table 4. a.** Maternal deaths ≤ 365 days of a livebirth or stillbirth, comparing CIHI-DAD or CIHI-NACRS, vs. ORGD. Results include unlinked ORGD pregnancy-related deaths (Figure 1, **red**) in the numerator and denominator during percent agreement calculations. **b.** Maternal deaths ≤ 365 days of the ending of a recognized pregnancy, comparing a recognized pregnancy in CIHI-DAD, CIHI-NACRS or CIHI-SDS, vs. ORGD. Results include unlinked ORGD pregnancy-related deaths (Figure 2, **red**) in the numerator and denominator during percent agreement calculations.

a.

| CIHI death | ORGD death |           | Total     |
|------------|------------|-----------|-----------|
|            | Yes        | No        |           |
| Yes        | 278        | 34        | 312       |
| No         | 197        | 1,679,023 | 1,679,220 |
| Total      | 475        | 1,679,057 | 1,679,532 |

b.

| CIHI death | ORGD death |           | Total     |
|------------|------------|-----------|-----------|
|            | Yes        | No        |           |
| Yes        | 346        | 47        | 393       |
| No         | 256        | 2,039,268 | 2,039,524 |
| Total      | 602        | 2,039,315 | 2,039,917 |

| Agreement indicator        | Value (95% CI)      |
|----------------------------|---------------------|
| Cohen's Kappa              | 0.71 (0.82 to 0.91) |
| Sensitivity                | 0.59 (0.54 to 0.63) |
| Specificity                | 1.00 (1.00 to 1.00) |
| Positive Predictive Value  | 0.89 (0.86 to 0.93) |
| Negative Predictive Value  | 1.00 (1.00 to 1.00) |
| Overall Percent Agreement  | 1.00 (1.00 to 1.00) |
| Positive Percent Agreement | 0.59 (0.54 to 0.63) |
| Negative Percent Agreement | 1.00 (1.00 to 1.00) |

| Agreement indicator        | Value (95% CI)      |
|----------------------------|---------------------|
| Cohen's Kappa              | 0.70 (0.66 to 0.73) |
| Sensitivity                | 0.57 (0.54 to 0.61) |
| Specificity                | 1.00 (1.00 to 1.00) |
| Positive Predictive Value  | 0.88 (0.85 to 0.91) |
| Negative Predictive Value  | 1.00 (1.00 to 1.00) |
| Overall Percent Agreement  | 1.00 (1.00 to 1.00) |
| Positive Percent Agreement | 0.57 (0.54 to 0.61) |
| Negative Percent Agreement | 1.00 (1.00 to 1.00) |



**Figure 1.** Creation of a linked file that contains the deaths of women of reproductive age in the ORGD with records of obstetrical livebirths or stillbirths at  $\geq 20$  weeks' gestation in the CIHI-DAD or NACRS.

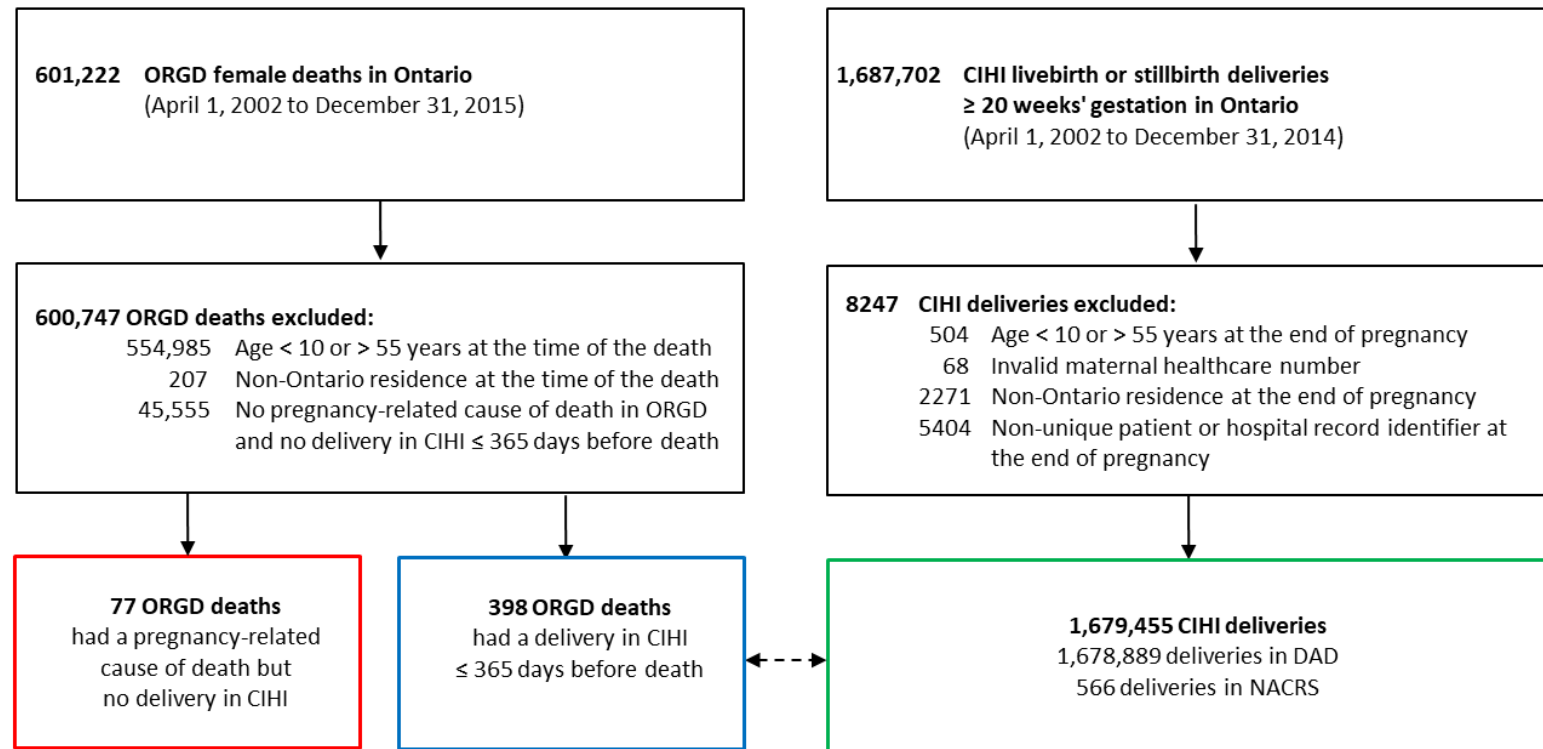

Abbreviations: ORGD: Office of the Registrar General - Deaths; CIHI: Canadian Institute for Health Information; DAD: Discharge Abstract Database; NACRS: National Ambulatory Care Reporting System; SDS: Same Day Surgery

\* Includes livebirth or stillbirth deliveries  $\geq 20$  weeks' gestation.

\*\* Pregnancy-related death in ORGD is defined as having a cause death (immediate, antecedent or other significant condition) ICD-10 code starting with an "O".

1  
2  
3  
4  
5  
6  
7  
8  
9  
10  
11  
12  
13  
14  
15  
16  
17  
18  
19  
20  
21  
22  
23  
24  
25  
26  
27  
28  
29  
30  
31  
32  
33  
34  
35  
36  
37  
38  
39  
40  
41  
42  
43  
44  
45  
46  
47

**Figure 2.** Creation of a linked file that contains the deaths of women of reproductive age in the ORGD with women who have been identified with any recognized pregnancy outcome in the CIHI-DAD, SDS, and NACRS.

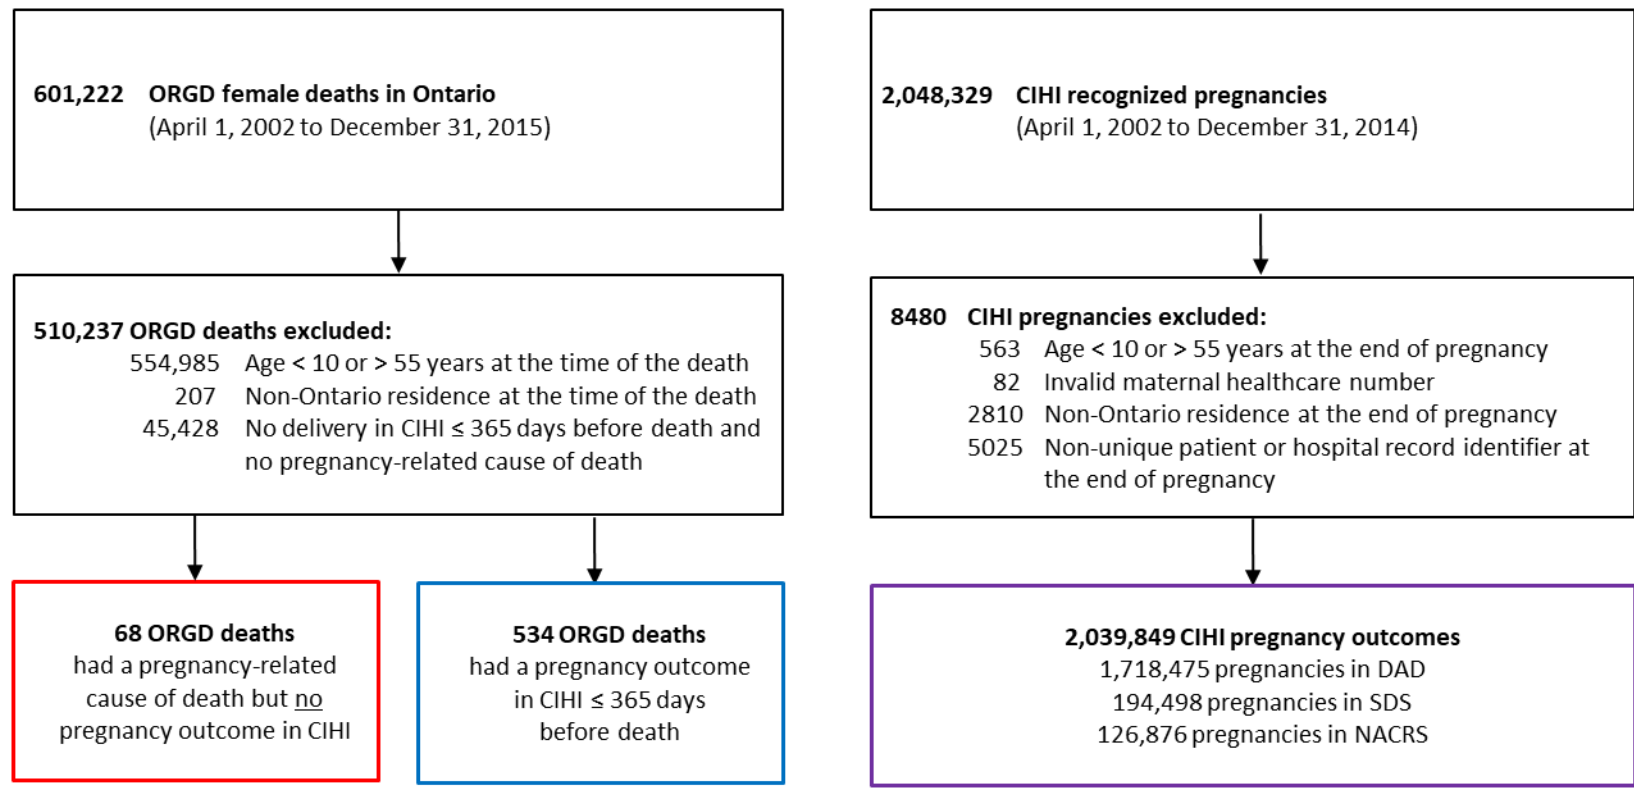

Abbreviations: ORGD: Office of the Registrar General - Deaths; CIHI: Canadian Institute for Health Information; DAD: Discharge Abstract Database; NACRS: National Ambulatory Care Reporting System; SDS: Same Day Surgery

\* Includes livebirth or stillbirth deliveries ≥ 20 weeks' gestation.  
\*\* Pregnancy-related death in ORGD is defined as having a cause death (immediate, antecedent or other significant condition) ICD-10 code starting with an "O".

**Table S1. Method to calculate positive and negative percent agreement.**

| Data source | ORGD |   |
|-------------|------|---|
| CIHI        | a    | b |
|             | c    | d |

Overall percent agreement =  $(a + d)/(a + b + c + d)$ .

However, the overall percent does not differentiate between the agreement on the positives and agreement on the negatives. Hence, it is often recommended that one report positive percent agreement (PPA) and negative percent agreement (NPA) when there is an imperfect reference standard (in this case, the ORGD).

$$\text{PPA} = a/(a + c)$$

$$\text{NPA} = d/(b + d)$$

Confidential

**Table S2. Any cause of death  $\leq$  42 days of delivery among women who had a livebirth or stillbirth in CIHI and a death record in ORGD.** Cause of death is ranked according to the 3-digit ICD-10 code (4-digits for amniotic fluid embolism). Each case may have had more one cause of death, so the total count may exceed the number of cases. Suppression is required at 5 or fewer counts.

| ICD-10 code | Label                                                                                                                       | Number     | %          |
|-------------|-----------------------------------------------------------------------------------------------------------------------------|------------|------------|
| O99         | Other maternal diseases classifiable elsewhere but complicating pregnancy, childbirth and the puerperium                    | 74         | 15.4       |
| O75         | Other complications of labour and delivery, not elsewhere classified                                                        | 66         | 13.7       |
| O881        | Amniotic fluid embolism                                                                                                     | 23         | 4.8        |
| O14         | Gestational [pregnancy-induced] hypertension with significant proteinuria                                                   | 20         | 4.3        |
| O26         | Maternal care for other conditions predominantly related to pregnancy                                                       | 20         | 4.3        |
| O72         | Postpartum haemorrhage                                                                                                      | 14         | 3.0        |
| O90         | Complications of the puerperium, not elsewhere classified                                                                   | 14         | 3.0        |
| O96*        | Death from any obstetric cause occurring more than 42 days but less than one year after delivery                            | 14         | 3.0        |
| O882        | Obstetric blood-clot embolism                                                                                               | 11         | 2.3        |
| O16         | Unspecified maternal hypertension                                                                                           | 9          | 1.9        |
| O85         | Puerperal sepsis                                                                                                            | 9          | 1.9        |
| O45         | Premature separation of placenta [abruptio placentae]                                                                       | 8          | 1.7        |
| O22         | Venous complications in pregnancy                                                                                           | 7          | 1.5        |
| O95         | Obstetric death of unspecified cause                                                                                        | 7          | 1.5        |
| O98         | Maternal infectious and parasitic diseases classifiable elsewhere but complicating pregnancy, childbirth and the puerperium | 7          | 1.5        |
| C80         | Malignant neoplasm without specification of site                                                                            | 6          | 1.3        |
| I61         | Intracerebral haemorrhage                                                                                                   | 6          | 1.3        |
| I60         | Subarachnoid haemorrhage                                                                                                    | Suppressed | Suppressed |
| O46         | Antepartum haemorrhage, not elsewhere classified                                                                            | Suppressed | Suppressed |
| O86         | Other puerperal infections                                                                                                  | Suppressed | Suppressed |
| C50         | Malignant neoplasm of breast                                                                                                | Suppressed | Suppressed |
| O36         | Maternal care for other known or suspected fetal problems                                                                   | Suppressed | Suppressed |
| T40         | Poisoning by narcotics and psychodysleptics [hallucinogens]                                                                 | Suppressed | Suppressed |
| T51         | Toxic effect of alcohol                                                                                                     | Suppressed | Suppressed |
| V89         | Motor- or nonmotor-vehicle accident, type of vehicle unspecified                                                            | Suppressed | Suppressed |
| X45         | Accidental poisoning by and exposure to alcohol                                                                             | Suppressed | Suppressed |
| X70         | Intentional self-harm by hanging, strangulation and suffocation                                                             | Suppressed | Suppressed |
| C16         | Malignant neoplasm of stomach                                                                                               | Suppressed | Suppressed |
| I67         | Other cerebrovascular diseases                                                                                              | Suppressed | Suppressed |
| O13         | Gestational [pregnancy-induced] hypertension without significant proteinuria                                                | Suppressed | Suppressed |
| O44         | Placenta praevia                                                                                                            | Suppressed | Suppressed |
| O68         | Labour and delivery complicated by fetal stress [distress]                                                                  | Suppressed | Suppressed |
| T71         | Asphyxiation                                                                                                                | Suppressed | Suppressed |

| ICD-10 code | Label                                                                                                                      | Number     | %          |
|-------------|----------------------------------------------------------------------------------------------------------------------------|------------|------------|
| X44         | Accidental poisoning by and exposure to other and unspecified drugs, medicaments and biological substances                 | Suppressed | Suppressed |
| C22         | Malignant neoplasm of liver and intrahepatic bile ducts                                                                    | Suppressed | Suppressed |
| C25         | Malignant neoplasm of pancreas                                                                                             | Suppressed | Suppressed |
| D68         | Other coagulation defects                                                                                                  | Suppressed | Suppressed |
| G00         | Bacterial meningitis, not elsewhere classified                                                                             | Suppressed | Suppressed |
| G93         | Other disorders of brain                                                                                                   | Suppressed | Suppressed |
| I27         | Other pulmonary heart diseases                                                                                             | Suppressed | Suppressed |
| I40         | Acute myocarditis                                                                                                          | Suppressed | Suppressed |
| I64         | Stroke, not specified as haemorrhage or infarction                                                                         | Suppressed | Suppressed |
| N19         | Unspecified renal failure                                                                                                  | Suppressed | Suppressed |
| O10         | Pre-existing hypertension complicating pregnancy, childbirth and the puerperium                                            | Suppressed | Suppressed |
| O24         | Diabetes mellitus in pregnancy                                                                                             | Suppressed | Suppressed |
| O30         | Multiple gestation                                                                                                         | Suppressed | Suppressed |
| O32         | Maternal care for known or suspected malpresentation of fetus                                                              | Suppressed | Suppressed |
| O34         | Maternal care for known or suspected abnormality of pelvic organs                                                          | Suppressed | Suppressed |
| O41         | Other disorders of amniotic fluid and membranes                                                                            | Suppressed | Suppressed |
| O42         | Premature rupture of membranes                                                                                             | Suppressed | Suppressed |
| O69         | Labour and delivery complicated by umbilical cord complications                                                            | Suppressed | Suppressed |
| O71         | Other obstetric trauma                                                                                                     | Suppressed | Suppressed |
| O87         | Venous complications in the puerperium                                                                                     | Suppressed | Suppressed |
| Q23         | Congenital malformations of aortic and mitral valves                                                                       | Suppressed | Suppressed |
| R97         | R97                                                                                                                        | Suppressed | Suppressed |
| S09         | Other and unspecified injuries of head                                                                                     | Suppressed | Suppressed |
| S29         | Other and unspecified injuries of thorax                                                                                   | Suppressed | Suppressed |
| T07         | Unspecified multiple injuries                                                                                              | Suppressed | Suppressed |
| V48         | Car occupant injured in noncollision transport accident                                                                    | Suppressed | Suppressed |
| V87         | Traffic accident of specified type but victim's mode of transport unknown                                                  | Suppressed | Suppressed |
| X42         | Accidental poisoning by and exposure to narcotics and psychodysleptics [hallucinogens], not elsewhere classified           | Suppressed | Suppressed |
| X99         | Assault by sharp object                                                                                                    | Suppressed | Suppressed |
| Y00         | Assault by blunt object                                                                                                    | Suppressed | Suppressed |
| Y12         | Poisoning by and exposure to narcotics and psychodysleptics [hallucinogens], not elsewhere classified, undetermined intent | Suppressed | Suppressed |
| A41         | Other septicaemia                                                                                                          | Suppressed | Suppressed |
| B18         | Chronic viral hepatitis                                                                                                    | Suppressed | Suppressed |
| C18         | Malignant neoplasm of colon                                                                                                | Suppressed | Suppressed |
| E66         | Obesity                                                                                                                    | Suppressed | Suppressed |
| E86         | Volume depletion                                                                                                           | Suppressed | Suppressed |
| E87         | Other disorders of fluid, electrolyte and acid-base balance                                                                | Suppressed | Suppressed |
| F32         | Depressive episode                                                                                                         | Suppressed | Suppressed |

| ICD-10 code | Label                                                                                                                                                                                     | Number     | %          |
|-------------|-------------------------------------------------------------------------------------------------------------------------------------------------------------------------------------------|------------|------------|
| G08         | Intracranial and intraspinal phlebitis and thrombophlebitis                                                                                                                               | Suppressed | Suppressed |
| I10         | Essential (primary) hypertension                                                                                                                                                          | Suppressed | Suppressed |
| I46         | Cardiac arrest                                                                                                                                                                            | Suppressed | Suppressed |
| I74         | Arterial embolism and thrombosis                                                                                                                                                          | Suppressed | Suppressed |
| J90         | Pleural effusion, not elsewhere classified                                                                                                                                                | Suppressed | Suppressed |
| J96         | Respiratory failure, not elsewhere classified                                                                                                                                             | Suppressed | Suppressed |
| K72         | Hepatic failure, not elsewhere classified                                                                                                                                                 | Suppressed | Suppressed |
| O15         | Eclampsia                                                                                                                                                                                 | Suppressed | Suppressed |
| Q28         | Other congenital malformations of circulatory system                                                                                                                                      | Suppressed | Suppressed |
| R56         | Convulsions, not elsewhere classified                                                                                                                                                     | Suppressed | Suppressed |
| R68         | Other general symptoms and signs                                                                                                                                                          | Suppressed | Suppressed |
| R99         | Other ill-defined and unspecified causes of mortality                                                                                                                                     | Suppressed | Suppressed |
| S31         | Open wound of abdomen, lower back and pelvis                                                                                                                                              | Suppressed | Suppressed |
| T43         | Poisoning by psychotropic drugs, not elsewhere classified                                                                                                                                 | Suppressed | Suppressed |
| T50         | Poisoning by diuretics and other and unspecified drugs, medicaments and biological substances                                                                                             | Suppressed | Suppressed |
| T82         | Complications of cardiac and vascular prosthetic devices, implants and grafts                                                                                                             | Suppressed | Suppressed |
| X89         | Assault by other specified chemicals and noxious substances                                                                                                                               | Suppressed | Suppressed |
| Y83         | Surgical operation and other surgical procedures as the cause of abnormal reaction of the patient, or of later complication, without mention of misadventure at the time of the procedure | Suppressed | Suppressed |
| O883        | Obstetric pyaemic and septic embolism                                                                                                                                                     | Suppressed | Suppressed |
| O880        | Obstetric air embolism                                                                                                                                                                    | Suppressed | Suppressed |
|             | <b>Total</b>                                                                                                                                                                              | <b>482</b> | <b>100</b> |

**Table S3. Any cause of death from 43 to 365 days of delivery among women who had a livebirth or stillbirth in CIHI and a death record in ORGD.** Cause of death is ranked according to the 3-digit ICD-10 code (4-digits for amniotic fluid embolism). Each case may have had more one cause of death, so the total count may exceed the number of cases. Suppression is required at 5 or fewer counts.

| ICD-10 code | Label                                                                                                                                                                                     | Number | %   |
|-------------|-------------------------------------------------------------------------------------------------------------------------------------------------------------------------------------------|--------|-----|
| T71         | Asphyxiation                                                                                                                                                                              | 48     | 5.1 |
| X70         | Intentional self-harm by hanging, strangulation and suffocation                                                                                                                           | 34     | 3.6 |
| C79         | Secondary malignant neoplasm of other sites                                                                                                                                               | 24     | 2.5 |
| X42         | Accidental poisoning by and exposure to narcotics and psychodysleptics [hallucinogens], not elsewhere classified                                                                          | 22     | 2.3 |
| O96         | Death from any obstetric cause occurring more than 42 days but less than one year after delivery                                                                                          | 19     | 2.0 |
| C50         | Malignant neoplasm of breast                                                                                                                                                              | 18     | 1.9 |
| T40         | Poisoning by narcotics and psychodysleptics [hallucinogens]                                                                                                                               | 18     | 1.9 |
| I49         | Other cardiac arrhythmias                                                                                                                                                                 | 17     | 1.8 |
| C92         | Myeloid leukaemia                                                                                                                                                                         | 16     | 1.7 |
| C34         | Malignant neoplasm of bronchus and lung                                                                                                                                                   | 14     | 1.5 |
| V89         | Motor- or nonmotor-vehicle accident, type of vehicle unspecified                                                                                                                          | 14     | 1.5 |
| A41         | Other septicaemia                                                                                                                                                                         | 13     | 1.4 |
| F19         | Mental and behavioural disorders due to multiple drug use and use of other psychoactive substances                                                                                        | 13     | 1.4 |
| X00         | Exposure to uncontrolled fire in building or structure                                                                                                                                    | 13     | 1.4 |
| W76         | Other accidental hanging and strangulation                                                                                                                                                | 12     | 1.3 |
| C71         | Malignant neoplasm of brain                                                                                                                                                               | 10     | 1.1 |
| E14         | Unspecified diabetes mellitus                                                                                                                                                             | 10     | 1.1 |
| G93         | Other disorders of brain                                                                                                                                                                  | 10     | 1.1 |
| I26         | Pulmonary embolism                                                                                                                                                                        | 10     | 1.1 |
| I51         | Complications and ill-defined descriptions of heart disease                                                                                                                               | 10     | 1.1 |
| I60         | Subarachnoid haemorrhage                                                                                                                                                                  | 10     | 1.1 |
| J18         | Pneumonia, organism unspecified                                                                                                                                                           | 10     | 1.1 |
| T14         | Injury of unspecified body region                                                                                                                                                         | 10     | 1.1 |
| T50         | Poisoning by diuretics and other and unspecified drugs, medicaments and biological substances                                                                                             | 10     | 1.1 |
| S09         | Other and unspecified injuries of head                                                                                                                                                    | 9      | 1.0 |
| F53         | Mental and behavioural disorders associated with the puerperium, not elsewhere classified                                                                                                 | 8      | 0.9 |
| I46         | Cardiac arrest                                                                                                                                                                            | 8      | 0.9 |
| T07         | Unspecified multiple injuries                                                                                                                                                             | 8      | 0.9 |
| C78         | Secondary malignant neoplasm of respiratory and digestive organs                                                                                                                          | 7      | 0.7 |
| C80         | Malignant neoplasm without specification of site                                                                                                                                          | 7      | 0.7 |
| M32         | Systemic lupus erythematosus                                                                                                                                                              | 7      | 0.7 |
| Y83         | Surgical operation and other surgical procedures as the cause of abnormal reaction of the patient, or of later complication, without mention of misadventure at the time of the procedure | 7      | 0.7 |

| ICD-10 code | Label                                                                                                                                       | Number     | %          |
|-------------|---------------------------------------------------------------------------------------------------------------------------------------------|------------|------------|
| C43         | Malignant melanoma of skin                                                                                                                  | 6          | 0.6        |
| C53         | Malignant neoplasm of cervix uteri                                                                                                          | 6          | 0.6        |
| D43         | Neoplasm of uncertain or unknown behaviour of brain and central nervous system                                                              | 6          | 0.6        |
| I21         | Acute myocardial infarction                                                                                                                 | 6          | 0.6        |
| I25         | Chronic ischaemic heart disease                                                                                                             | 6          | 0.6        |
| K85         | Acute pancreatitis                                                                                                                          | 6          | 0.6        |
| R97         | R97                                                                                                                                         | 6          | 0.6        |
| R99         | Other ill-defined and unspecified causes of mortality                                                                                       | 6          | 0.6        |
| T51         | Toxic effect of alcohol                                                                                                                     | 6          | 0.6        |
| T59         | Toxic effect of other gases, fumes and vapours                                                                                              | 6          | 0.6        |
| V43         | Car occupant injured in collision with car, pick-up truck or van                                                                            | 6          | 0.6        |
| V87         | Traffic accident of specified type but victim's mode of transport unknown                                                                   | 6          | 0.6        |
| X41         | Accidental poisoning by and exposure to antiepileptic, sedative-hypnotic, antiparkinsonism and psychotropic drugs, not elsewhere classified | 6          | 0.6        |
| X44         | Accidental poisoning by and exposure to other and unspecified drugs, medicaments and biological substances                                  | 6          | 0.6        |
| X45         | Accidental poisoning by and exposure to alcohol                                                                                             | 6          | 0.6        |
| Y00         | Assault by blunt object                                                                                                                     | 6          | 0.6        |
| C16         | Malignant neoplasm of stomach                                                                                                               | Suppressed | Suppressed |
| C85         | Other and unspecified types of non-Hodgkin's lymphoma                                                                                       | Suppressed | Suppressed |
| I33         | Acute and subacute endocarditis                                                                                                             | Suppressed | Suppressed |
| I42         | Cardiomyopathy                                                                                                                              | Suppressed | Suppressed |
| I63         | Cerebral infarction                                                                                                                         | Suppressed | Suppressed |
| J96         | Respiratory failure, not elsewhere classified                                                                                               | Suppressed | Suppressed |
| K55         | Vascular disorders of intestine                                                                                                             | Suppressed | Suppressed |
| R57         | Shock, not elsewhere classified                                                                                                             | Suppressed | Suppressed |
| T75         | Effects of other external causes                                                                                                            | Suppressed | Suppressed |
| C84         | Peripheral and cutaneous T-cell lymphomas                                                                                                   | Suppressed | Suppressed |
| E78         | Disorders of lipoprotein metabolism and other lipidaemias                                                                                   | Suppressed | Suppressed |
| F10         | Mental and behavioural disorders due to use of alcohol                                                                                      | Suppressed | Suppressed |
| F32         | Depressive episode                                                                                                                          | Suppressed | Suppressed |
| I34         | Nonrheumatic mitral valve disorders                                                                                                         | Suppressed | Suppressed |
| I72         | Other aneurysm                                                                                                                              | Suppressed | Suppressed |
| K72         | Hepatic failure, not elsewhere classified                                                                                                   | Suppressed | Suppressed |
| O88         | Obstetric embolism                                                                                                                          | Suppressed | Suppressed |
| O90         | Complications of the puerperium, not elsewhere classified                                                                                   | Suppressed | Suppressed |
| R09         | Other symptoms and signs involving the circulatory and respiratory systems                                                                  | Suppressed | Suppressed |
| R58         | Haemorrhage, not elsewhere classified                                                                                                       | Suppressed | Suppressed |
| R68         | Other general symptoms and signs                                                                                                            | Suppressed | Suppressed |
| S06         | Intracranial injury                                                                                                                         | Suppressed | Suppressed |



| ICD-10 code | Label                                                                                                                                                             | Number     | %          |
|-------------|-------------------------------------------------------------------------------------------------------------------------------------------------------------------|------------|------------|
| S11         | Open wound of neck                                                                                                                                                | Suppressed | Suppressed |
| S29         | Other and unspecified injuries of thorax                                                                                                                          | Suppressed | Suppressed |
| T17         | Foreign body in respiratory tract                                                                                                                                 | Suppressed | Suppressed |
| T81         | Complications of procedures, not elsewhere classified                                                                                                             | Suppressed | Suppressed |
| T86         | Failure and rejection of transplanted organs and tissues                                                                                                          | Suppressed | Suppressed |
| V03         | Pedestrian injured in collision with car, pick-up truck or van                                                                                                    | Suppressed | Suppressed |
| V86         | Occupant of special all-terrain or other motor vehicle designed primarily for off-road use, injured in transport accident                                         | Suppressed | Suppressed |
| X74         | Intentional self-harm by other and unspecified firearm discharge                                                                                                  | Suppressed | Suppressed |
| X80         | Intentional self-harm by jumping from a high place                                                                                                                | Suppressed | Suppressed |
| X91         | Assault by hanging, strangulation and suffocation                                                                                                                 | Suppressed | Suppressed |
| X99         | Assault by sharp object                                                                                                                                           | Suppressed | Suppressed |
| Y21         | Drowning and submersion, undetermined intent                                                                                                                      | Suppressed | Suppressed |
| C26         | Malignant neoplasm of other and ill-defined digestive organs                                                                                                      | Suppressed | Suppressed |
| C56         | Malignant neoplasm of ovary                                                                                                                                       | Suppressed | Suppressed |
| C95         | Leukaemia of unspecified cell type                                                                                                                                | Suppressed | Suppressed |
| D57         | Sickle-cell disorders                                                                                                                                             | Suppressed | Suppressed |
| D68         | Other coagulation defects                                                                                                                                         | Suppressed | Suppressed |
| E66         | Obesity                                                                                                                                                           | Suppressed | Suppressed |
| E87         | Other disorders of fluid, electrolyte and acid-base balance                                                                                                       | Suppressed | Suppressed |
| F14         | Mental and behavioural disorders due to use of cocaine                                                                                                            | Suppressed | Suppressed |
| G00         | Bacterial meningitis, not elsewhere classified                                                                                                                    | Suppressed | Suppressed |
| G40         | Epilepsy                                                                                                                                                          | Suppressed | Suppressed |
| I61         | Intracerebral haemorrhage                                                                                                                                         | Suppressed | Suppressed |
| I67         | Other cerebrovascular diseases                                                                                                                                    | Suppressed | Suppressed |
| J45         | Asthma                                                                                                                                                            | Suppressed | Suppressed |
| J80         | Adult respiratory distress syndrome                                                                                                                               | Suppressed | Suppressed |
| M06         | Other rheumatoid arthritis                                                                                                                                        | Suppressed | Suppressed |
| M72         | Fibroblastic disorders                                                                                                                                            | Suppressed | Suppressed |
| O99         | Other maternal diseases classifiable elsewhere but complicating pregnancy, childbirth and the puerperium                                                          | Suppressed | Suppressed |
| Q05         | Spina bifida                                                                                                                                                      | Suppressed | Suppressed |
| Q21         | Congenital malformations of cardiac septa                                                                                                                         | Suppressed | Suppressed |
| Q24         | Other congenital malformations of heart                                                                                                                           | Suppressed | Suppressed |
| T42         | Poisoning by antiepileptic, sedative-hypnotic and antiparkinsonism drugs                                                                                          | Suppressed | Suppressed |
| T43         | Poisoning by psychotropic drugs, not elsewhere classified                                                                                                         | Suppressed | Suppressed |
| T58         | Toxic effect of carbon monoxide                                                                                                                                   | Suppressed | Suppressed |
| V49         | Car occupant injured in other and unspecified transport accidents                                                                                                 | Suppressed | Suppressed |
| X59         | Exposure to unspecified factor                                                                                                                                    | Suppressed | Suppressed |
| Y84         | Other medical procedures as the cause of abnormal reaction of the patient, or of later complication, without mention of misadventure at the time of the procedure | Suppressed | Suppressed |
| A87         | Viral meningitis                                                                                                                                                  | Suppressed | Suppressed |

| ICD-10 code | Label                                                                            | Number     | %          |
|-------------|----------------------------------------------------------------------------------|------------|------------|
| B01         | Varicella [chickenpox]                                                           | Suppressed | Suppressed |
| C18         | Malignant neoplasm of colon                                                      | Suppressed | Suppressed |
| C25         | Malignant neoplasm of pancreas                                                   | Suppressed | Suppressed |
| C49         | Malignant neoplasm of other connective and soft tissue                           | Suppressed | Suppressed |
| C64         | Malignant neoplasm of kidney, except renal pelvis                                | Suppressed | Suppressed |
| C67         | Malignant neoplasm of bladder                                                    | Suppressed | Suppressed |
| C81         | Hodgkin's disease                                                                | Suppressed | Suppressed |
| C91         | Lymphoid leukaemia                                                               | Suppressed | Suppressed |
| D70         | Agranulocytosis                                                                  | Suppressed | Suppressed |
| D76         | Certain diseases involving lymphoreticular tissue and reticulohistiocytic system | Suppressed | Suppressed |
| E10         | Type 1 Diabetes mellitus                                                         | Suppressed | Suppressed |
| F31         | Bipolar affective disorder                                                       | Suppressed | Suppressed |
| G04         | Encephalitis, myelitis and encephalomyelitis                                     | Suppressed | Suppressed |
| G91         | Hydrocephalus                                                                    | Suppressed | Suppressed |
| I11         | Hypertensive heart disease                                                       | Suppressed | Suppressed |
| I27         | Other pulmonary heart diseases                                                   | Suppressed | Suppressed |
| I50         | Heart failure                                                                    | Suppressed | Suppressed |
| I71         | Aortic aneurysm and dissection                                                   | Suppressed | Suppressed |
| I74         | Arterial embolism and thrombosis                                                 | Suppressed | Suppressed |
| J46         | J46                                                                              | Suppressed | Suppressed |
| K46         | Unspecified abdominal hernia                                                     | Suppressed | Suppressed |
| K65         | Peritonitis                                                                      | Suppressed | Suppressed |
| K80         | Cholelithiasis                                                                   | Suppressed | Suppressed |
| L03         | Cellulitis                                                                       | Suppressed | Suppressed |
| N13         | Obstructive and reflux uropathy                                                  | Suppressed | Suppressed |
| N19         | Unspecified renal failure                                                        | Suppressed | Suppressed |
| N39         | Other disorders of urinary system                                                | Suppressed | Suppressed |
| O03         | Spontaneous abortion                                                             | Suppressed | Suppressed |
| O08         | Complications following abortion and ectopic and molar pregnancy                 | Suppressed | Suppressed |
| O26         | Maternal care for other conditions predominantly related to pregnancy            | Suppressed | Suppressed |
| Q03         | Congenital hydrocephalus                                                         | Suppressed | Suppressed |
| Q85         | Phakomatoses, not elsewhere classified                                           | Suppressed | Suppressed |
| R04         | Haemorrhage from respiratory passages                                            | Suppressed | Suppressed |
| S01         | Open wound of head                                                               | Suppressed | Suppressed |
| S02         | Fracture of skull and facial bones                                               | Suppressed | Suppressed |
| S12         | Fracture of neck                                                                 | Suppressed | Suppressed |
| S19         | Other and unspecified injuries of neck                                           | Suppressed | Suppressed |
| S36         | Injury of intra-abdominal organs                                                 | Suppressed | Suppressed |
| S39         | Other and unspecified injuries of abdomen, lower back and pelvis                 | Suppressed | Suppressed |
| T09         | Other injuries of spine and trunk, level unspecified                             | Suppressed | Suppressed |
| T68         | Hypothermia                                                                      | Suppressed | Suppressed |

| ICD-10 code | Label                                                                                                                | Number     | %          |
|-------------|----------------------------------------------------------------------------------------------------------------------|------------|------------|
| T79         | Certain early complications of trauma, not elsewhere classified                                                      | Suppressed | Suppressed |
| V13         | Pedal cyclist injured in collision with car, pick-up truck or van                                                    | Suppressed | Suppressed |
| V19         | Pedal cyclist injured in other and unspecified transport accidents                                                   | Suppressed | Suppressed |
| V47         | Car occupant injured in collision with fixed or stationary object                                                    | Suppressed | Suppressed |
| V48         | Car occupant injured in noncollision transport accident                                                              | Suppressed | Suppressed |
| W19         | Unspecified fall                                                                                                     | Suppressed | Suppressed |
| W80         | Inhalation and ingestion of other objects causing obstruction of respiratory tract                                   | Suppressed | Suppressed |
| X64         | Intentional self-poisoning by and exposure to other and unspecified drugs, medicaments and biological substances     | Suppressed | Suppressed |
| X67         | Intentional self-poisoning by and exposure to other gases and vapours                                                | Suppressed | Suppressed |
| X78         | Intentional self-harm by sharp object                                                                                | Suppressed | Suppressed |
| X81         | Intentional self-harm by jumping or lying before moving object                                                       | Suppressed | Suppressed |
| X84         | Intentional self-harm by unspecified means                                                                           | Suppressed | Suppressed |
| X95         | Assault by other and unspecified firearm discharge                                                                   | Suppressed | Suppressed |
| Y03         | Assault by crashing of motor vehicle                                                                                 | Suppressed | Suppressed |
| Y14         | Poisoning by and exposure to other and unspecified drugs, medicaments and biological substances, undetermined intent | Suppressed | Suppressed |
| Y85         | Sequelae of transport accidents                                                                                      | Suppressed | Suppressed |
| A48         | Other bacterial diseases, not elsewhere classified                                                                   | Suppressed | Suppressed |
| B59         | Pneumocystosis                                                                                                       | Suppressed | Suppressed |
| C22         | Malignant neoplasm of liver and intrahepatic bile ducts                                                              | Suppressed | Suppressed |
| C47         | Malignant neoplasm of peripheral nerves and autonomic nervous system                                                 | Suppressed | Suppressed |
| D32         | Benign neoplasm of meninges                                                                                          | Suppressed | Suppressed |
| D33         | Benign neoplasm of brain and other parts of central nervous system                                                   | Suppressed | Suppressed |
| D36         | Benign neoplasm of other and unspecified sites                                                                       | Suppressed | Suppressed |
| D61         | Other aplastic anaemias                                                                                              | Suppressed | Suppressed |
| D65         | Disseminated intravascular coagulation [defibrination syndrome]                                                      | Suppressed | Suppressed |
| E03         | Other hypothyroidism                                                                                                 | Suppressed | Suppressed |
| F11         | Mental and behavioural disorders due to use of opioids                                                               | Suppressed | Suppressed |
| F17         | Mental and behavioural disorders due to use of tobacco                                                               | Suppressed | Suppressed |
| F23         | Acute and transient psychotic disorders                                                                              | Suppressed | Suppressed |
| F29         | Unspecified nonorganic psychosis                                                                                     | Suppressed | Suppressed |
| G41         | Status epilepticus                                                                                                   | Suppressed | Suppressed |
| I05         | Rheumatic mitral valve diseases                                                                                      | Suppressed | Suppressed |
| I07         | Rheumatic tricuspid valve diseases                                                                                   | Suppressed | Suppressed |
| I10         | Essential (primary) hypertension                                                                                     | Suppressed | Suppressed |
| I20         | Angina pectoris                                                                                                      | Suppressed | Suppressed |
| I31         | Other diseases of pericardium                                                                                        | Suppressed | Suppressed |
| I38         | Endocarditis, valve unspecified                                                                                      | Suppressed | Suppressed |
| I40         | Acute myocarditis                                                                                                    | Suppressed | Suppressed |

| ICD-10 code | Label                                                                                     | Number     | %          |
|-------------|-------------------------------------------------------------------------------------------|------------|------------|
| I47         | Paroxysmal tachycardia                                                                    | Suppressed | Suppressed |
| I62         | Other nontraumatic intracranial haemorrhage                                               | Suppressed | Suppressed |
| I64         | Stroke, not specified as haemorrhage or infarction                                        | Suppressed | Suppressed |
| I80         | Phlebitis and thrombophlebitis                                                            | Suppressed | Suppressed |
| J15         | Bacterial pneumonia, not elsewhere classified                                             | Suppressed | Suppressed |
| J69         | Pneumonitis due to solids and liquids                                                     | Suppressed | Suppressed |
| J81         | Pulmonary oedema                                                                          | Suppressed | Suppressed |
| J94         | Other pleural conditions                                                                  | Suppressed | Suppressed |
| K29         | Gastritis and duodenitis                                                                  | Suppressed | Suppressed |
| K74         | Fibrosis and cirrhosis of liver                                                           | Suppressed | Suppressed |
| L89         | Decubitus ulcer                                                                           | Suppressed | Suppressed |
| L93         | Lupus erythematosus                                                                       | Suppressed | Suppressed |
| N17         | Acute renal failure                                                                       | Suppressed | Suppressed |
| N26         | Unspecified contracted kidney                                                             | Suppressed | Suppressed |
| O75         | Other complications of labour and delivery, not elsewhere classified                      | Suppressed | Suppressed |
| Q86         | Congenital malformation syndromes due to known exogenous causes, not elsewhere classified | Suppressed | Suppressed |
| R00         | Abnormalities of heart beat                                                               | Suppressed | Suppressed |
| R10         | Abdominal and pelvic pain                                                                 | Suppressed | Suppressed |
| R11         | Nausea and vomiting                                                                       | Suppressed | Suppressed |
| R18         | Ascites                                                                                   | Suppressed | Suppressed |
| R40         | Somnolence, stupor and coma                                                               | Suppressed | Suppressed |
| R50         | Fever of unknown origin                                                                   | Suppressed | Suppressed |
| R52         | Pain, not elsewhere classified                                                            | Suppressed | Suppressed |
| R59         | Enlarged lymph nodes                                                                      | Suppressed | Suppressed |
| R94         | Abnormal results of function studies                                                      | Suppressed | Suppressed |
| S18         | Traumatic amputation at neck level                                                        | Suppressed | Suppressed |
| S21         | Open wound of thorax                                                                      | Suppressed | Suppressed |
| S22         | Fracture of rib(s), sternum and thoracic spine                                            | Suppressed | Suppressed |
| S26         | Injury of heart                                                                           | Suppressed | Suppressed |
| S27         | Injury of other and unspecified intrathoracic organs                                      | Suppressed | Suppressed |
| S32         | Fracture of lumbar spine and pelvis                                                       | Suppressed | Suppressed |
| T02         | Fractures involving multiple body regions                                                 | Suppressed | Suppressed |
| T45         | Poisoning by primarily systemic and haematological agents, not elsewhere classified       | Suppressed | Suppressed |
| T82         | Complications of cardiac and vascular prosthetic devices, implants and grafts             | Suppressed | Suppressed |
| T84         | Complications of internal orthopaedic prosthetic devices, implants and grafts             | Suppressed | Suppressed |
| T90         | Sequelae of injuries of head                                                              | Suppressed | Suppressed |
| W18         | Other fall on same level                                                                  | Suppressed | Suppressed |
| W49         | Exposure to other and unspecified inanimate mechanical forces                             | Suppressed | Suppressed |
| W65         | Drowning and submersion while in bath-tub                                                 | Suppressed | Suppressed |

| ICD-10 code  | Label                                                                                    | Number     | %          |
|--------------|------------------------------------------------------------------------------------------|------------|------------|
| X31          | Exposure to excessive natural cold                                                       | Suppressed | Suppressed |
| Y42          | Hormones and their synthetic substitutes and antagonists, not elsewhere classified       | Suppressed | Suppressed |
| Y60          | Unintentional cut, puncture, perforation or haemorrhage during surgical and medical care | Suppressed | Suppressed |
| <b>Total</b> |                                                                                          | <b>945</b> | <b>100</b> |

Confidential
